# Supplementary material for: Heats of formation on the way from B2H6 to B20H16: thermochemical consequences of multicenter bonding in ab initio and DFT methods
Source: Royal Society of Chemistry journal article supplement (doi:10.1039/d4dt02589j), 2024-11-05
Supplement: d4dt02589j1.pdf [file d4dt02589j1.pdf]

**Table S1.** Comparison of geometrical parameters for B<sub>2</sub>H<sub>6</sub>, B<sub>4</sub>H<sub>10</sub>, B<sub>5</sub>H<sub>11</sub>, and B<sub>6</sub>H<sub>12</sub> from electron diffraction<sup>1-3</sup> and theoretical methods. Bond lengths in Å.

| Molecule                       | Bond                  | Exp.  | MP2/cc-pVDZ | B3LYP/DZVP-DFT | MP2/ccpVTZ |
|--------------------------------|-----------------------|-------|-------------|----------------|------------|
| B <sub>2</sub> H <sub>6</sub>  | B-B                   | 1.770 | 1.784       | 1.776          | 1.740      |
|                                | B-H <sub>t</sub>      | 1.187 | 1.201       | 1.191          | 1.179      |
|                                | B-H <sub>b</sub>      | 1.334 | 1.328       | 1.324          | 1.301      |
| B <sub>4</sub> H <sub>10</sub> | B1-B2                 | 1.866 | 1.866       | 1.871          | 1.830      |
|                                | B1-B3                 | 1.737 | 1.740       | 1.730          | 1.712      |
|                                | B1-H1,2               | 1.230 | 1.266       | 1.261          | 1.245      |
|                                | B2-H1,2               | 1.417 | 1.428       | 1.426          | 1.403      |
|                                | B1-H1                 | 1.198 | 1.195       | 1.185          | 1.174      |
|                                | B2-H2 <sub>endo</sub> | 1.210 | 1.207       | 1.195          | 1.186      |
|                                | B2-H2 <sub>exo</sub>  | 1.205 | 1.202       | 1.191          | 1.180      |
|                                | B5H <sub>11</sub>     | B1-B2 | 1.904       | 1.901          | 1.910      |
| B1-B3                          | 1.742                 | 1.747 | 1.746       | 1.719          |            |
| B1-B4                          | 1.755                 | 1.762 | 1.757       | 1.734          |            |
| B1-B5                          | 1.876                 | 1.881 | 1.889       | 1.849          |            |
| B2-B3                          | 1.749                 | 1.771 | 1.791       | 1.736          |            |
| B3-B4                          | 1.800                 | 1.806 | 1.809       | 1.771          |            |
| B4-B5                          | 1.822                 | 1.835 | 1.843       | 1.803          |            |
| B1-H1 <sub>exo</sub>           | 1.192                 | 1.196 | 1.185       | 1.175          |            |
| B1-H1 <sub>endo</sub>          | 1.315                 | 1.258 | 1.255       | 1.242          |            |
| B2-H2,3                        | 1.377                 | 1.400 | 1.398       | 1.367          |            |
| B3-H2,3                        | 1.278                 | 1.293 | 1.289       | 1.275          |            |
| B3-H3,4                        | 1.351                 | 1.367 | 1.368       | 1.346          |            |
| B4-H3,4                        | 1.314                 | 1.334 | 1.326       | 1.309          |            |
| B4-H4,5                        | 1.259                 | 1.278 | 1.268       | 1.258          |            |
| B5-H4,5                        | 1.396                 | 1.415 | 1.416       | 1.384          |            |
| B2-H1 <sub>endo</sub>          | 1.957                 | 1.993 | 2.096       | 1.981          |            |
| B5-H1 <sub>endo</sub>          | 1.553                 | 1.474 | 1.441       | 1.442          |            |
| B <sub>6</sub> H <sub>12</sub> | B1-B2                 | 1.897 | 1.920       | 1.918          | 1.891      |
|                                | B2-B5                 | 1.782 | 1.811       | 1.806          | 1.779      |
|                                | B2-B6                 | 1.744 | 1.738       | 1.737          | 1.712      |
|                                | B1-B6                 | 1.748 | 1.758       | 1.744          | 1.723      |
|                                | B5-B6                 | 1.783 | 1.814       | 1.816          | 1.780      |
|                                | B5-H5,6               | 1.305 | 1.301       | 1.302          | 1.282      |
|                                | B6-H5,6               | 1.377 | 1.381       | 1.367          | 1.357      |
|                                | B1-H16                | 1.371 | 1.373       | 1.371          | 1.342      |

|                           |        |       |       |       |       |
|---------------------------|--------|-------|-------|-------|-------|
|                           | B6-H16 | 1.311 | 1.308 | 1.303 | 1.288 |
| Mean absolute error (MAE) |        |       | 0.015 | 0.02  | 0.023 |

**Table S2.** Computed gas phase enthalpy of formation ( $\Delta_f H^0$ ) in kcal mol<sup>-1</sup>.

| Molecule                                     | Avg. exp. | CCSD(T) //MP2 | CCSD(T) //MP2 | B3LYP  | B3LYP-D3//B3LYP | B3LYP-D3-0//B3LYP | BLYP//B3LYP | BLYP-D3//B3LYP | BLYP-D3-0//B3LYP | $\omega$ B97X-D3BJ//B3LYP | $\omega$ B97X-D3-0//B3LYP | $\omega$ B97X-V//B3LYP |
|----------------------------------------------|-----------|---------------|---------------|--------|-----------------|-------------------|-------------|----------------|------------------|---------------------------|---------------------------|------------------------|
| B <sub>10</sub> H <sub>16</sub>              | 34.8      | 29.7          | 9.4           | 34.4   | -10.7           | 14.1              | 65.0        | 9.9            | 41.0             | -14.1                     | -1.9                      | -6.3                   |
| B <sub>2</sub> H <sub>6</sub>                | 7.9       | 8.0           | 3.9           | 1.8    | -3.1            | 0.3               | 9.9         | 3.9            | 8.0              | 1.5                       | 3.2                       | 1.7                    |
| B <sub>4</sub> H <sub>10</sub>               | 13.8      | 13.8          | 5.5           | 9.1    | -4.4            | 2.9               | 23.9        | 7.2            | 16.3             | -2.4                      | 2.3                       | 0.0                    |
| B <sub>5</sub> H <sub>11</sub>               | 22.2      | 21.2          | 11.1          | 17.9   | 0.8             | 9.8               | 34.9        | 14.0           | 25.1             | 1.1                       | 7.1                       | 4.5                    |
| B <sub>5</sub> H <sub>9</sub>                | 16.0      | 14.5          | 4.6           | 13.8   | -7.9            | 4.8               | 29.5        | 2.9            | 18.9             | -6.5                      | -0.9                      | -3.0                   |
| B <sub>6</sub> H <sub>10</sub>               | 19.6      | 20.4          | 8.9           | 20.8   | 1.5             | 12.0              | 38.7        | 15.1           | 28.1             | -4.1                      | 3.2                       | 0.5                    |
| B <sub>6</sub> H <sub>12</sub>               | 26.5      | 24.9          | 12.9          | 23.1   | 3.9             | 13.9              | 42.5        | 19.0           | 31.4             | 1.0                       | 8.4                       | 5.5                    |
| B <sub>8</sub> H <sub>12</sub>               | --        | 21.5          | --            | --     | --              | --                | --          | --             | --               | --                        | --                        | --                     |
| B <sub>9</sub> H <sub>15</sub>               | --        | 14.7          | --            | --     | --              | --                | --          | --             | --               | --                        | --                        | --                     |
| B <sub>10</sub> H <sub>14</sub>              | 5.6       | -2.5          | -23.5         | 12.0   | -29.2           | -8.1              | 41.8        | -8.4           | 17.7             | -47.5                     | --                        | -35.9                  |
| B <sub>20</sub> H <sub>16</sub>              | --        | -33.8         | --            | --     | --              | --                | --          | --             | --               | --                        | --                        | --                     |
| B <sub>2</sub> Cl <sub>4</sub>               | -116.9    | -117.0        | -118.8        | -106.0 | -116.0          | -109.7            | -104.8      | -116.8         | -109.1           | -128.2                    | -122.6                    | -124.7                 |
| B <sub>2</sub> F <sub>4</sub>                | -342.2    | -344.0        | -346.3        | -339.5 | -342.5          | -340.8            | -347.7      | -351.3         | -349.1           | -343.7                    | -344.0                    | -346.4                 |
| B <sub>2</sub> O <sub>3</sub>                | -199.8    | -199.5        | -201.2        | -200.6 | -203.8          | -201.3            | -215.2      | -219.1         | -216.1           | -201.1                    | -200.8                    | -201.8                 |
| B <sub>3</sub> N <sub>3</sub> H <sub>6</sub> | -123.0    | -117.6        | -122.8        | -129.9 | -140.3          | -133.5            | -129.8      | -142.6         | -134.2           | -136.2                    | -130.6                    | -137.0                 |
| BCl <sub>3</sub>                             | -96.9     | -97.9         | -98.7         | -89.7  | -95.2           | -90.8             | -89.1       | -95.7          | -90.4            | -104.3                    | -100.5                    | -102.2                 |
| BF <sub>3</sub>                              | -270.7    | -272.7        | -273.9        | -268.0 | -269.3          | -268.5            | -273.6      | -275.2         | -274.2           | -269.2                    | -270.2                    | -271.6                 |
| BHO <sub>2</sub>                             | -134.0    | -130.6        | -130.6        | -130.8 | -132.4          | -131.2            | -139.3      | -141.2         | -139.7           | -130.5                    | -131.0                    | -131.6                 |
| BO <sub>3</sub> H <sub>3</sub>               | -237.2    | -238.1        | -239.5        | -233.7 | -237.0          | -235.2            | -239.4      | -243.4         | -241.2           | -236.8                    | -237.1                    | -239.4                 |

**The coordinates for the optimized structures of the studied molecules :**

8

B2H6, MP2/cc-pVDZ, Energy -33280.67907552641 kcal/mol Converged!

|   |              |             |              |
|---|--------------|-------------|--------------|
| B | 0.004061130  | 2.447633763 | -0.891681719 |
| H | 0.001705437  | 1.458062673 | -0.006546368 |
| H | 1.056158825  | 2.448300035 | -1.469963568 |
| H | -1.048696536 | 2.454839941 | -1.469022553 |
| H | 0.007819245  | 3.425052921 | 0.006849850  |
| B | 0.003248251  | 2.435488718 | 0.891984259  |
| H | 1.054878718  | 2.428277664 | 1.471151497  |
| H | -1.049975074 | 2.434834284 | 1.468438602  |

8

B2H6, B3LYP/DZVP-DFT, Energy -33403.43947071097 kcal/mol Converged!

|   |              |             |              |
|---|--------------|-------------|--------------|
| B | 0.003990208  | 2.447608455 | -0.887983531 |
| H | 0.001940877  | 1.459543815 | -0.006536401 |
| H | 1.047113061  | 2.448272675 | -1.462393505 |
| H | -1.039821111 | 2.454763097 | -1.461179320 |
| H | 0.008046271  | 3.423570179 | 0.006839866  |
| B | 0.003202348  | 2.435514268 | 0.888285914  |
| H | 1.045830260  | 2.428361830 | 1.463570285  |
| H | -1.041101918 | 2.434855681 | 1.460606693  |

14

B4H10, MP2/cc-pVDZ, Energy -65836.70477366938 kcal/mol Converged!

|   |              |              |              |
|---|--------------|--------------|--------------|
| B | -0.045771339 | 0.045243638  | -0.035410995 |
| B | 0.048280613  | -0.021413819 | 1.826809581  |
| B | 1.784996697  | -0.023284754 | -0.388878290 |
| B | 0.979327041  | 1.199808207  | 0.767609266  |
| H | -0.907966324 | 0.433816090  | 2.395586590  |
| H | -0.499665938 | -0.815785622 | 0.773654795  |
| H | 0.707902620  | 2.343400056  | 0.554052620  |
| H | 2.426021342  | -0.925454858 | 0.092790816  |
| H | 0.668739932  | -0.925326234 | 2.331535174  |
| H | -0.905002832 | 0.525092427  | -0.712564138 |
| H | 0.632401410  | -0.819612369 | -0.663740746 |
| H | 1.075954453  | 0.954160990  | 2.005586471  |
| H | 2.105874333  | 0.431091084  | -1.454564614 |
| H | 2.204254991  | 0.952854166  | 0.565165470  |

14

B4H10, B3LYP/DZVP-DFT, Energy -66065.16301007479 kcal/mol Converged!

|   |              |              |              |
|---|--------------|--------------|--------------|
| B | -0.040750532 | 0.045533711  | -0.031409399 |
| B | 0.044180158  | -0.024067176 | 1.835943820  |
| B | 1.792871866  | -0.025996591 | -0.395114260 |
| B | 0.978510942  | 1.193448287  | 0.766968051  |
| H | -0.904632419 | 0.434261765  | 2.390574135  |
| H | -0.504024604 | -0.804804093 | 0.776542274  |

|   |              |              |              |
|---|--------------|--------------|--------------|
| H | 0.723545864  | 2.333258798  | 0.566193437  |
| H | 2.438158547  | -0.919011992 | 0.067608450  |
| H | 0.647204210  | -0.918644715 | 2.349762772  |
| H | -0.899148078 | 0.504231667  | -0.707599389 |
| H | 0.634157612  | -0.808320651 | -0.669149142 |
| H | 1.064299638  | 0.957285460  | 2.002953214  |
| H | 2.102068203  | 0.431496940  | -1.450044913 |
| H | 2.198905596  | 0.955917590  | 0.554402951  |

16

B5H11, MP2/cc-pVDZ, Energy -81745.93017669841 kcal/mol Converged!

|   |              |              |              |
|---|--------------|--------------|--------------|
| B | -0.076102118 | 0.047294574  | 0.035657904  |
| B | -0.027340541 | -0.093267828 | 1.930489702  |
| B | 1.427931521  | -0.070927045 | 0.963357816  |
| B | 1.368621625  | 0.783296660  | 2.553409034  |
| B | -0.260076344 | 1.619780580  | 2.671361814  |
| H | 1.241044395  | 0.459119536  | -0.201517574 |
| H | 1.095714773  | 2.022493867  | 2.701853584  |
| H | 2.113074589  | 0.999525091  | 1.467919279  |
| H | -0.933710559 | 0.746855746  | 1.693291813  |
| H | -0.378764493 | -1.076986971 | 2.512459582  |
| H | -0.668932293 | 1.603702208  | 3.801371391  |
| H | -0.579860703 | 2.540294669  | 1.953981414  |
| H | -0.628313401 | 1.063557110  | -0.300066803 |
| H | -0.238509116 | -0.958502092 | -0.603993228 |
| H | 2.143660906  | -1.027980680 | 0.923571788  |
| H | 2.044718759  | 0.364450575  | 3.444548484  |

16

B5H11, B3LYP/DZVP-DFT, Energy -82021.32023509318 kcal/mol Converged!

|   |              |              |              |
|---|--------------|--------------|--------------|
| B | -0.061214813 | 0.018897560  | 0.011879572  |
| B | -0.035554930 | -0.075674374 | 1.919649850  |
| B | 1.416069254  | -0.059996909 | 0.949390663  |
| B | 1.364369334  | 0.777783372  | 2.551064326  |
| B | -0.260075779 | 1.638484593  | 2.680356531  |
| H | 1.244962461  | 0.462281351  | -0.216940872 |
| H | 1.106387170  | 2.005341961  | 2.735598670  |
| H | 2.108031829  | 0.996576513  | 1.475040632  |
| H | -0.946511437 | 0.772165030  | 1.755906950  |
| H | -0.400181254 | -1.047618367 | 2.492123384  |
| H | -0.669983612 | 1.600872417  | 3.797117098  |
| H | -0.557346839 | 2.578788943  | 2.000022024  |
| H | -0.656486002 | 0.992096665  | -0.332374341 |
| H | -0.183802655 | -0.988103815 | -0.614044232 |
| H | 2.131544599  | -1.003449940 | 0.918777122  |
| H | 2.042949672  | 0.354261001  | 3.424128623  |

14

B5H9, MP2/cc-pVDZ, Energy -81024.01661177716 kcal/mol Converged!

|   |              |              |              |
|---|--------------|--------------|--------------|
| H | -0.006483159 | 0.006044051  | -0.063451089 |
| B | 0.001243261  | -0.000805776 | 1.128914098  |
| B | 1.290669530  | 0.001312022  | 2.258157996  |
| B | -1.272379696 | -0.017023161 | 2.275834689  |
| B | 0.000075164  | 1.273703540  | 2.274957252  |
| B | 0.018281336  | -1.289366219 | 2.259030010  |
| H | 0.957931978  | 0.942329557  | 3.176499580  |
| H | -0.940444576 | 0.928944964  | 3.189479171  |
| H | -0.926760052 | -0.969435258 | 3.177796540  |
| H | 0.971539230  | -0.955967995 | 3.164597777  |
| H | 0.025729908  | -2.476545683 | 2.120984891  |
| H | 2.477751592  | 0.010709105  | 2.119247374  |
| H | -0.009139298 | 2.462613453  | 2.152467579  |
| H | -2.461387220 | -0.024846601 | 2.154178131  |

14

B5H9, B3LYP/DZVP-DFT, Energy -81285.89446101974 kcal/mol Converged!

|   |              |              |              |
|---|--------------|--------------|--------------|
| H | -0.006160085 | 0.005759021  | -0.040922085 |
| B | 0.001330788  | -0.000888614 | 1.142620125  |
| B | 1.287251565  | 0.001279631  | 2.262155897  |
| B | -1.268941283 | -0.016991994 | 2.279736708  |
| B | 0.000107774  | 1.270265076  | 2.278867621  |
| B | 0.018247851  | -1.285939478 | 2.263025031  |
| H | 0.972248888  | 0.956943616  | 3.166496495  |
| H | -0.955112391 | 0.943417169  | 3.179651484  |
| H | -0.941184195 | -0.983952852 | 3.167811963  |
| H | 0.986037688  | -0.970280795 | 3.154391466  |
| H | 0.025568132  | -2.461976125 | 2.117998879  |
| H | 2.463163853  | 0.010624935  | 2.116260365  |
| H | -0.009026435 | 2.448123098  | 2.149441891  |
| H | -2.446904150 | -0.024716688 | 2.151158160  |

16

B6H10, MP2/cc-pVDZ, Energy -96935.13607267635 kcal/mol Converged!

|   |              |              |              |
|---|--------------|--------------|--------------|
| B | -0.030006296 | 0.064165880  | 0.072080360  |
| B | -0.000595042 | 0.000612785  | 1.838897738  |
| B | 1.541453108  | 0.069414080  | 0.965085046  |
| B | 1.411592176  | -1.069597397 | 2.302470246  |
| B | -1.045540710 | -1.135282355 | 0.964807080  |
| B | -0.090463915 | -1.769025858 | 2.302349711  |
| H | 1.173353751  | -0.284554681 | -0.320465676 |
| H | -0.537382792 | -1.081323508 | -0.320612272 |
| H | -0.437256235 | 0.938735244  | -0.633343969 |
| H | 2.360026694  | 0.928452270  | 0.814986528  |
| H | -2.229814515 | -1.208873481 | 0.814416716  |
| H | -0.420937784 | 0.903127855  | 2.502553599  |
| H | 2.216422501  | -0.903219562 | 3.174397883  |
| H | -0.735922729 | -2.277940861 | 3.174175124  |
| H | 2.040436284  | -1.168824972 | 1.119746687  |

H -0.419074496 -2.314144437 1.119563197

16

B6H10, B3LYP/DZVP-DFT, Energy -97244.86787255722 kcal/mol Converged!

B -0.027584279 0.058972417 0.067093647  
B -0.001943573 0.003514025 1.825750166  
B 1.542333438 0.060334588 0.970844548  
B 1.404803405 -1.069987233 2.303074740  
B -1.039171013 -1.141794121 0.970575831  
B -0.085783688 -1.764071571 2.302974518  
H 1.172312195 -0.263275245 -0.325694088  
H -0.553026464 -1.066805306 -0.325876553  
H -0.433180679 0.930012766 -0.625677749  
H 2.354478375 0.910872912 0.826268500  
H -2.212806354 -1.215936789 0.825687390  
H -0.417004540 0.894681722 2.487349343  
H 2.203757369 -0.899931177 3.165279652  
H -0.730265572 -2.266129814 3.165072006  
H 2.056121791 -1.158935308 1.129293828  
H -0.436750412 -2.319800867 1.129092220

18

B6H12-arachno, MP2/cc-pVDZ, Energy -97659.33136663596 kcal/mol Converged!

B -0.905126925 0.027146859 -0.318534873  
B 0.905126935 -0.027146872 -0.318534851  
B -0.118063622 -1.452744750 0.139316597  
B 0.118063611 1.452744738 0.139316606  
B -1.485207911 -1.043820404 1.165982036  
B 1.485207920 1.043820432 1.165982033  
H -1.565254879 0.128157836 -1.310853940  
H 1.565254909 -0.128157858 -1.310853899  
H -0.126456395 -2.402870056 -0.587245458  
H 0.126456388 2.402870057 -0.587245418  
H -2.393494347 -1.816015104 1.015006440  
H 2.393494284 1.816015202 1.015006406  
H 1.147235757 -1.021449917 0.485548453  
H -1.147235782 1.021449886 0.485548431  
H -0.354713859 -1.793525714 1.379436535  
H 0.354713809 1.793525649 1.379436574  
H 1.457196511 0.325409395 2.132344162  
H -1.457196405 -0.325409378 2.132344168

18

B6H12-arachno, B3LYP/DZVP-DFT, Energy -97981.78301626982 kcal/mol Converged!

B -0.902169384 0.033949317 -0.284819440  
B 0.902169381 -0.033949313 -0.284819443  
B -0.132822091 -1.455983293 0.168318613  
B 0.132822091 1.455983297 0.168318611  
B -1.542781976 -1.092870881 1.128569472

|   |              |              |              |
|---|--------------|--------------|--------------|
| B | 1.542781978  | 1.092870877  | 1.128569469  |
| H | -1.560583297 | 0.168785116  | -1.260695284 |
| H | 1.560583290  | -0.168785115 | -1.260695290 |
| H | -0.110170801 | -2.384281168 | -0.567110383 |
| H | 0.110170800  | 2.384281171  | -0.567110386 |
| H | -2.411836512 | -1.876822183 | 0.908307607  |
| H | 2.411836524  | 1.876822163  | 0.908307609  |
| H | 1.120616168  | -1.036318723 | 0.517366141  |
| H | -1.120616166 | 1.036318730  | 0.517366144  |
| H | -0.411799722 | -1.824037620 | 1.387126896  |
| H | 0.411799731  | 1.824037629  | 1.387126891  |
| H | 1.606988602  | 0.409966131  | 2.103936386  |
| H | -1.606988616 | -0.409966134 | 2.103936386  |

24

B10H14, MP2/cc-pVDZ, Energy -160635.02955243064 kcal/mol Converged!

|   |              |              |              |
|---|--------------|--------------|--------------|
| B | -0.006884363 | -0.027081873 | 0.033598342  |
| B | -0.006333898 | -0.027332558 | 1.825862558  |
| B | 1.551818844  | -0.029157897 | 0.929266345  |
| B | -1.374901377 | 0.718776594  | 0.930239006  |
| B | 2.256463095  | 1.565717190  | 0.929219011  |
| B | -1.227945345 | 2.456208771  | 0.930491484  |
| B | 1.292811665  | 1.044588208  | -0.501812295 |
| B | 1.293648316  | 1.044299449  | 2.360719006  |
| B | -0.633297479 | 1.536934482  | -0.501113939 |
| B | -0.632513723 | 1.536454520  | 2.361452400  |
| H | 1.603410686  | 2.248805756  | -0.031963788 |
| H | 1.603901699  | 2.248619770  | 1.890853833  |
| H | -0.327709788 | 2.742383005  | -0.031077624 |
| H | -0.327267967 | 2.742098019  | 1.891741182  |
| H | 3.397351838  | 1.924498783  | 0.928937639  |
| H | -2.056801724 | 3.318349723  | 0.930840692  |
| H | 1.832455406  | 0.962097015  | -1.567560340 |
| H | 1.833966640  | 0.961685694  | 3.426118036  |
| H | -1.146959898 | 1.723813904  | -1.566486270 |
| H | -1.145584822 | 1.722855680  | 3.427192489  |
| H | -0.238440520 | -0.936607463 | 2.572464463  |
| H | -0.239478683 | -0.936141022 | -0.713115489 |
| H | -2.451834623 | 0.198914583  | 0.930462835  |
| H | 2.247300022  | -1.002012332 | 0.928951422  |

26

B10H16\_12, MP2/cc-pVDZ, Energy -161324.42685854388 kcal/mol Converged!

|   |              |              |              |
|---|--------------|--------------|--------------|
| B | 0.170308586  | -1.986322584 | -1.278315951 |
| B | -0.959831066 | -1.917359586 | 0.005921005  |
| B | 0.088975923  | -3.273497269 | -0.002309534 |
| B | 0.243998394  | -0.690668124 | -0.001545777 |
| B | 0.119851857  | 0.986463090  | 0.000132040  |
| B | -0.915937522 | 2.013798894  | 0.903990540  |

|   |              |              |              |
|---|--------------|--------------|--------------|
| B | -0.916017615 | 2.015158999  | -0.901922925 |
| B | 0.882771356  | 2.229475482  | -0.902277579 |
| B | 0.882887711  | 2.227968783  | 0.904387268  |
| H | 0.062074107  | -1.980660300 | 2.463756765  |
| H | -0.119744502 | -4.451372286 | -0.001707697 |
| H | 0.028046598  | -1.977022506 | -2.466277978 |
| H | 1.025488298  | -3.003115656 | 0.939244333  |
| H | 1.146943635  | -1.103595894 | 0.937211557  |
| H | 1.133525425  | -1.102268163 | -0.953681685 |
| H | 1.012182755  | -3.001441554 | -0.956574284 |
| H | -2.150794203 | -1.840262893 | 0.014753401  |
| H | 1.732906625  | 2.196493811  | -1.742403396 |
| H | 1.209124059  | 3.187702883  | 0.001735248  |
| H | 1.733169249  | 2.193958617  | 1.744334323  |
| H | -0.123263962 | 3.023548250  | 1.344693751  |
| H | -1.732896320 | 1.779956835  | -1.741525714 |
| H | -0.123421451 | 3.025684561  | -1.341226447 |
| H | -1.732731168 | 1.777374628  | 1.743324925  |
| H | -1.455099729 | 2.872534416  | 0.001712582  |
| B | 0.188202961  | -1.988155435 | 1.274048231  |

36

B20H16, MP2/cc-pVDZ, Energy -316959.0422600347 kcal/mol Converged!

|   |              |              |              |
|---|--------------|--------------|--------------|
| H | -0.000000002 | 2.525159396  | 2.509783147  |
| H | -2.476881525 | -1.661701585 | 1.221343905  |
| B | -0.891735330 | 0.000000031  | 2.669221481  |
| B | -1.561388097 | 0.894107473  | 1.252059965  |
| H | -0.000000034 | -2.525159383 | 2.509783139  |
| H | -2.476881502 | 1.661701602  | 1.221343873  |
| B | 1.561388107  | -0.894107482 | 1.252059972  |
| B | -0.000000007 | 1.203154327  | 0.269242875  |
| B | 0.000000028  | 1.432388673  | 2.020116196  |
| B | -0.000000021 | -1.432388676 | 2.020116213  |
| H | -0.000000063 | 1.489517578  | -3.706422169 |
| H | 0.000000053  | -1.489517542 | -3.706422183 |
| B | -1.561388116 | -0.894107465 | 1.252059989  |
| H | 2.476881532  | 1.661701572  | 1.221343894  |
| B | 0.894107476  | 1.561388100  | -1.252059958 |
| B | 0.000000007  | -1.203154360 | 0.269242884  |
| B | 1.561388118  | 0.894107458  | 1.252059986  |
| H | 1.489517558  | 0.000000015  | 3.706422159  |
| H | 2.476881503  | -1.661701603 | 1.221343909  |
| H | -1.489517565 | 0.000000065  | 3.706422159  |
| B | 0.891735330  | -0.000000021 | 2.669221479  |
| H | 2.525159397  | 0.000000016  | -2.509783158 |
| H | -1.661701602 | -2.476881513 | -1.221343925 |
| B | 0.000000017  | -0.891735326 | -2.669221481 |
| B | 0.894107482  | -1.561388119 | -1.252059972 |
| H | -2.525159401 | -0.000000016 | -2.509783130 |



|   |              |              |              |
|---|--------------|--------------|--------------|
| H | 1.661701626  | -2.476881502 | -1.221343934 |
| B | -0.894107473 | 1.561388098  | -1.252059962 |
| B | 1.203154322  | -0.000000010 | -0.269242873 |
| B | 1.432388678  | 0.000000010  | -2.020116203 |
| B | -1.432388675 | -0.000000001 | -2.020116193 |
| H | -1.661701616 | 2.476881493  | -1.221343872 |
| B | -0.000000020 | 0.891735341  | -2.669221483 |
| B | -0.894107457 | -1.561388120 | -1.252059970 |
| H | 1.661701588  | 2.476881510  | -1.221343894 |
| B | -1.203154315 | -0.000000035 | -0.269242867 |

20

B8H12, MP2/cc-pVDZ, Energy -128771.34424709887 kcal/mol Converged!

|   |              |              |              |
|---|--------------|--------------|--------------|
| B | 1.594688923  | 0.841605539  | -0.420013658 |
| B | 1.511479213  | -0.875071186 | -0.508801382 |
| B | 0.919008157  | -0.031642938 | 0.903704160  |
| B | -1.511479213 | 0.875071186  | -0.508801382 |
| B | 0.038425188  | 1.429333757  | 0.271772872  |
| B | -0.038425188 | -1.429333757 | 0.271772872  |
| B | -0.919008157 | 0.031642938  | 0.903704160  |
| B | -1.594688923 | -0.841605539 | -0.420013658 |
| H | 2.539779278  | 1.539830076  | -0.636197294 |
| H | 2.398796920  | -1.631423684 | -0.771858717 |
| H | 1.398098742  | 0.044523481  | -1.492586990 |
| H | 0.213646846  | -1.410042509 | -0.996663965 |
| H | -2.539779278 | -1.539830076 | -0.636197294 |
| H | 1.446459491  | -0.008016400 | 1.978582272  |
| H | -1.398098742 | -0.044523481 | -1.492586990 |
| H | 0.004391062  | 2.523636426  | 0.754513703  |
| H | -0.213646846 | 1.410042509  | -0.996663965 |
| H | -0.004391062 | -2.523636426 | 0.754513703  |
| H | -1.446459491 | 0.008016400  | 1.978582272  |
| H | -2.398796920 | 1.631423684  | -0.771858717 |

24

B9H15, MP2/cc-pVDZ, Energy -145426.22482286074 kcal/mol Converged!

|   |             |             |             |
|---|-------------|-------------|-------------|
| B | 2.979164492 | 5.312387362 | 4.078668530 |
| B | 3.213153053 | 5.578253630 | 2.244078863 |
| B | 4.126577964 | 6.618443997 | 3.392925785 |
| B | 4.863792821 | 6.078039744 | 1.887225695 |
| B | 4.518846831 | 4.423010769 | 1.399973474 |
| B | 5.985827163 | 6.097230413 | 3.242142124 |
| B | 6.221455761 | 4.904043970 | 1.872708606 |
| B | 5.588465201 | 3.352844312 | 2.392854743 |
| B | 6.492425166 | 4.383522315 | 3.525811271 |
| H | 6.806887344 | 6.928625891 | 3.503317786 |
| H | 4.907768168 | 6.947865361 | 1.063127117 |
| H | 3.861847076 | 7.779899123 | 3.502022795 |
| H | 7.497049644 | 4.016697784 | 4.059248963 |

|   |             |             |             |
|---|-------------|-------------|-------------|
| H | 7.106421474 | 5.004783485 | 1.076015071 |
| H | 2.333066071 | 6.038600207 | 1.577440149 |
| H | 5.944995383 | 2.246637019 | 2.114271594 |
| H | 4.258396165 | 4.018076112 | 0.303663165 |
| H | 4.262578347 | 3.447048562 | 2.276279763 |
| H | 5.527609894 | 3.459858655 | 3.740160810 |
| H | 5.871572462 | 5.281011908 | 4.293766582 |
| H | 4.102655907 | 6.047685134 | 4.527890574 |
| H | 1.945757154 | 5.761729418 | 4.494556636 |
| H | 3.413332608 | 4.317015971 | 4.632428981 |
| H | 2.797953852 | 4.565688858 | 2.889620923 |

6

B2Cl4, MP2/cc-pVDZ, Energy -1184910.3514161522 kcal/mol Converged!

|    |             |             |             |
|----|-------------|-------------|-------------|
| Cl | 1.500335746 | 4.721719001 | 5.005783585 |
| Cl | 1.321573851 | 2.321769599 | 6.853562557 |
| Cl | 4.835845163 | 4.328839872 | 7.300380638 |
| Cl | 4.886904494 | 2.459187724 | 4.911477520 |
| B  | 2.288487296 | 3.490643072 | 5.974060255 |
| B  | 3.983853451 | 3.427840733 | 6.060735445 |

6

B2Cl4, B3LYP/DZVP-DFT, Energy -1186133.5124191686 kcal/mol Converged!

|    |             |             |             |
|----|-------------|-------------|-------------|
| Cl | 1.495497101 | 4.725302146 | 5.002833538 |
| Cl | 1.314918392 | 2.318645291 | 6.856237002 |
| Cl | 4.841258775 | 4.331584084 | 7.304074268 |
| Cl | 4.892906060 | 2.456642439 | 4.907825118 |
| B  | 2.290625385 | 3.490143967 | 5.974417635 |
| B  | 3.981794288 | 3.427682074 | 6.060612440 |

6

B2F4, MP2/cc-pVDZ, Energy -281303.9657274391 kcal/mol Converged!

|   |             |             |             |
|---|-------------|-------------|-------------|
| F | 1.650048594 | 4.416339341 | 5.245095220 |
| F | 1.514518336 | 2.614798511 | 6.631931526 |
| F | 4.670614656 | 4.102574638 | 6.993540784 |
| F | 4.709481956 | 2.698900297 | 5.200321748 |
| B | 2.280164794 | 3.490329157 | 5.973901445 |
| B | 3.992171664 | 3.427058057 | 6.061209277 |

6

B2F4, B3LYP/DZVP-DFT, Energy -281893.61835768714 kcal/mol Converged!

|   |             |             |             |
|---|-------------|-------------|-------------|
| F | 1.649589160 | 4.413596165 | 5.247414154 |
| F | 1.514497843 | 2.617661953 | 6.629719773 |
| F | 4.670739121 | 4.100375942 | 6.990625418 |
| F | 4.709795999 | 2.701038946 | 5.203254299 |
| B | 2.278781599 | 3.490377219 | 5.973799489 |
| B | 3.993596279 | 3.426949775 | 6.061186867 |

5

B2O3, MP2/cc-pVDZ, Energy -172471.3879934379 kcal/mol Converged!

|   |              |              |             |
|---|--------------|--------------|-------------|
| O | -0.345140537 | 0.001131827  | 0.131052658 |
| B | 0.055197425  | -0.000163817 | 1.285229990 |
| O | 0.573097946  | -0.001858214 | 2.527031466 |
| B | -0.047276693 | 0.000222584  | 3.720878139 |
| O | -0.543556141 | 0.001884621  | 4.837190747 |

5

B2O3, B3LYP/DZVP-DFT, Energy -172854.76920422754 kcal/mol Converged!

|   |              |              |             |
|---|--------------|--------------|-------------|
| O | -0.274529356 | 0.000933154  | 0.084624580 |
| B | 0.046502999  | -0.000147070 | 1.255663131 |
| O | 0.457063148  | -0.001535029 | 2.522192726 |
| B | -0.058509471 | 0.000250510  | 3.749736569 |
| O | -0.478205319 | 0.001715435  | 4.889165994 |

12

B3N3H6, MP2/cc-pVDZ, Energy -151809.368655689 kcal/mol Converged!

|   |              |              |              |
|---|--------------|--------------|--------------|
| B | -0.025745150 | -0.000025933 | -0.014435139 |
| N | 0.026850028  | 0.000035406  | 1.419889828  |
| B | 1.259080438  | -0.000005669 | 2.155851676  |
| N | 2.474849539  | -0.000508389 | 1.393050135  |
| B | 2.496212348  | -0.000916985 | -0.042054533 |
| N | 1.227730343  | -0.000539057 | -0.713584354 |
| H | -1.076517800 | 0.000372423  | -0.605921985 |
| H | 3.533837253  | -0.001552795 | -0.656315576 |
| H | -0.845490091 | 0.000239304  | 1.936186208  |
| H | 1.216639743  | -0.000711142 | -1.727194101 |
| H | 1.272664692  | 0.000404170  | 3.361593318  |
| H | 3.358124659  | -0.000627333 | 1.890377524  |

12

B3N3H6, B3LYP/DZVP-DFT, Energy -152199.85114112485 kcal/mol Converged!

|   |              |              |              |
|---|--------------|--------------|--------------|
| B | -0.024597124 | -0.000026924 | -0.013792282 |
| N | 0.027946687  | 0.000037078  | 1.419237030  |
| B | 1.259065770  | -0.000006866 | 2.154542911  |
| N | 2.473744630  | -0.000508891 | 1.392430938  |
| B | 2.495071730  | -0.000914496 | -0.041382174 |
| N | 1.227745875  | -0.000538905 | -0.712312931 |
| H | -1.067681658 | 0.000369340  | -0.600949041 |
| H | 3.525107717  | -0.001546894 | -0.651144292 |
| H | -0.843036198 | 0.000239114  | 1.934736792  |
| H | 1.216672292  | -0.000711844 | -1.724353589 |
| H | 1.272546483  | 0.000401060  | 3.351455449  |
| H | 3.355649797  | -0.000627771 | 1.888974190  |

4

BCl3, MP2/cc-pVDZ, Energy -880917.6275817283 kcal/mol Converged!

|    |              |              |             |
|----|--------------|--------------|-------------|
| B  | 0.000000026  | -0.000000141 | 0.000001228 |
| Cl | -0.000000043 | 0.000000047  | 1.749259699 |

Cl 1.514900386 0.000000047 -0.874630493  
Cl -1.514900371 0.000000047 -0.874630435

4

BCl3, B3LYP/DZVP-DFT, Energy -881811.1128100856 kcal/mol Converged!

B 0.000000058 -0.000000525 0.000000453  
Cl -0.000000076 0.000000175 1.755812498  
Cl 1.520569472 0.000000175 -0.877906525  
Cl -1.520569454 0.000000175 -0.877906427

4

BF3, MP2/cc-pVDZ, Energy -203217.55714661628 kcal/mol Converged!

B 0.000000000 0.000000000 -0.000008632  
F -0.000000000 0.000000000 1.327539586  
F 1.149683653 0.000000000 -0.663765476  
F -1.149683653 0.000000000 -0.663765476

4

BF3, B3LYP/DZVP-DFT, Energy -203633.52025221277 kcal/mol Converged!

B 0.000000000 0.000000000 -0.000007107  
F -0.000000000 -0.000000000 1.324801930  
F 1.147345704 -0.000000000 -0.662397411  
F -1.147345704 -0.000000000 -0.662397411

4

BHO2, MP2/cc-pVDZ, Energy -110157.13781154735 kcal/mol Converged!

O 0.074628024 0.000265049 -0.043758413  
B 0.021625843 -0.000015531 1.295805475  
O 0.024225248 -0.000124782 2.521768159  
H -0.807128116 -0.002430736 -0.439576222

4

BHO2, B3LYP/DZVP-DFT, Energy -110400.56909568513 kcal/mol Converged!

O 0.062152962 0.000231317 -0.028949279  
B 0.022614637 -0.000023856 1.303867564  
O 0.032456056 -0.000093233 2.523975134  
H -0.803872655 -0.002420227 -0.464654419

7

BO3H3, MP2/cc-pVDZ, Energy -158046.82331254 kcal/mol Converged!

O 0.039384575 0.114292271 1.386753596  
B 0.422637044 -0.334990137 0.143143273  
O -0.259247090 -1.370782356 -0.454691777  
O 1.487663058 0.251370694 -0.502745104  
H 1.619485810 -0.180501610 -1.355870179  
H -0.970525342 -1.662418565 0.129006448  
H 0.618000946 0.838391703 1.656129742

7

BO3H3, B3LYP/DZVP-DFT, Energy -158394.382223527 kcal/mol Converged!

|   |              |              |              |
|---|--------------|--------------|--------------|
| O | 0.046341951  | 0.120499270  | 1.386184283  |
| B | 0.422715069  | -0.334972345 | 0.143123534  |
| O | -0.264702100 | -1.371044045 | -0.447105009 |
| O | 1.486268421  | 0.245384196  | -0.509813926 |
| H | 1.636730114  | -0.173679584 | -1.370522051 |
| H | -0.984940678 | -1.680070395 | 0.122787781  |
| H | 0.614986223  | 0.849244903  | 1.677071387  |

### References

1. K. Hedberg and V. Schomaker, *J. Am. Chem. Soc.* **1951**, 73, 1482–1487.
2. P. Brain, C. Morrison, S. Parsons and D. Rankin, *J. Chem. Soc., Dalton Trans.* **1996**, 4589–4596.
3. P. Brain, D. Hnyk, D. Rankin, M. Buhl and P. Schleyer, *Polyhedron* **1994**, 13, 1453–1466.
